# Supplementary material for: Non-photochemical laser-induced nucleation of supercooled glacial acetic acid
Source: Royal Society of Chemistry journal article supplement (doi:10.1039/c1cp22774b), 2011-11-17
Supplement: c1cp22774b.pdf [file c1cp22774b.pdf]

## Supporting Information: Non-photochemical laser-induced nucleation of supercooled glacial acetic acid

Martin R. Ward, Stephanie McHugh, Andrew J. Alexander\*

*School of Chemistry, University of Edinburgh, Edinburgh, Scotland, EH9 3JJ*

*e-mail: andrew.alexander@ed.ac.uk*

### 1. Near-infrared absorbance of acetic acid

The near-infrared absorption of glacial acetic acid (GAA) was measured using a spectrometer (Perkin–Elmer, Lambda 900). The heat capacity ( $C_p = 1.930 \text{ J g}^{-1} \text{ K}^{-1}$ ) and density ( $\rho_L = 1.080 \text{ g cm}^{-3}$ ) of GAA at  $-9 \text{ }^\circ\text{C}$  were estimated by fitting and extrapolation of data from the literature.<sup>1,2</sup> For a single pulse at a peak power of  $40 \text{ MW cm}^{-2}$ , the energy absorbed by acetic acid in the illuminated volume ( $0.046 \text{ cm}^3$ ) corresponds to a temperature rise of 6 mK; at  $900 \text{ MW cm}^{-2}$ , the rise is 0.14 K. We assume that convection and conduction are sufficiently fast to allow redistribution of heat throughout the entire volume of the sample ( $2 \text{ cm}^3$ ). At a peak power of  $40 \text{ MW cm}^{-2}$ , the energy absorbed by acetic acid would be  $0.6 \text{ mJ pulse}^{-1}$ , corresponding to a temperature rise of 14 mK for 100 pulses.

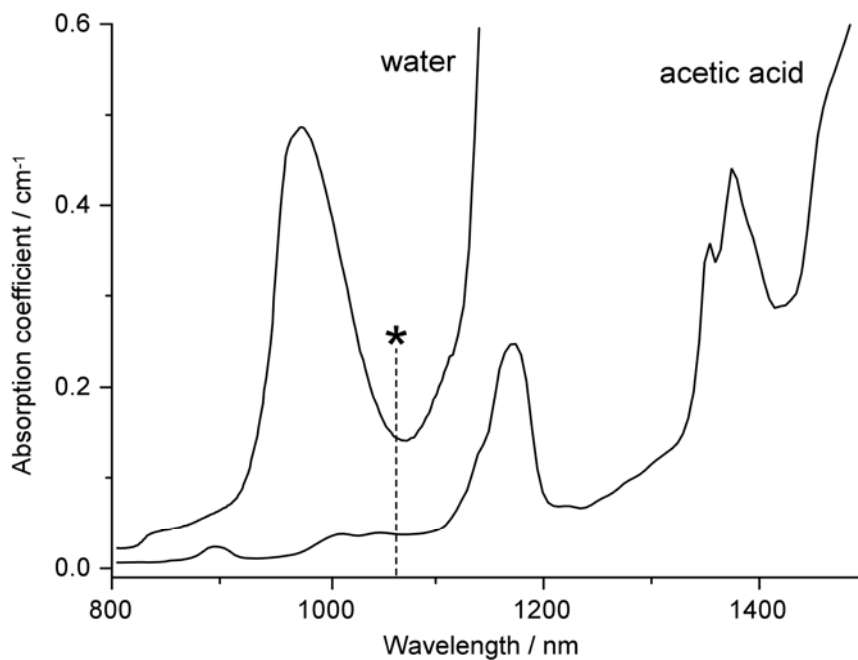

**Figure S1.** Plot of the near-infrared absorption coefficient of water and acetic acid. The absorption coefficients at 1064 nm, marked by the arrow, are  $0.144 \text{ cm}^{-1}$  (water, Kou et al.<sup>3</sup>) and  $0.0370 \text{ cm}^{-1}$  (acetic acid, present work).

## 2. Refractive indices of acetic acid

The refractive indices of GAA at 1064 nm and  $-9\text{ }^{\circ}\text{C}$  are not readily available, therefore we estimated them by extrapolation from available data in the literature. For the liquid, we extrapolate measurements of El-Kashef to find  $n_L = 1.3614$  (at 1064 nm,  $-9\text{ }^{\circ}\text{C}$ ).<sup>4</sup> For the solid, we use the Lorenz–Lorentz relation to estimate  $n_S$  from  $n_L$  at a specific frequency and temperature, using the densities of the solid ( $\rho_S = 1.274\text{ g cm}^{-3}$  by interpolation from literature data<sup>1</sup>) and the liquid ( $\rho_L = 1.080\text{ g cm}^{-3}$ ).<sup>5</sup> We calculate  $n_S = 1.4357$  at 1064 nm, which is in very good agreement with our calculations for a crystalline cluster consisting of 27 unit cells using the semi-empirical PM6–DH+ method ( $n = 1.4385$ ).<sup>6-8</sup>

1. U. Westhaus, T. Dröge and R. Sass, *Fluid Phase Equilibria*, 1999, **158-160**, 429-435.
2. F. Comelli, M. C. Righetti and R. Francesconi, *Thermochim. Acta*, 1997, **306**, 37-43.
3. L. H. Kou, D. Labrie and P. Chylek, *Appl. Optics*, 1993, **32**, 3531-3540.
4. H. El-Kashef, *Physica B*, 2000, **279**, 295-301.
5. S. de Jong, F. Groeneweg and F. V. Vader, *J. Appl. Crystallogr.*, 1991, **24**, 171-174.
6. M. Korth, *J. Chem. Theor. Comput.*, 2010, **6**, 3808-3816.
7. J. J. P. Stewart, *J. Mol. Modeling*, 2007, **13**, 1173-1213.
8. J. J. P. Stewart, *MOPAC2009*, (2008) Stewart Computational Chemistry, Colorado Springs, CO, USA.
